# Supplementary material
Source: Research Square preprint supplement (doi:10.21203/rs.3.rs-9816460/v1)
Supplement: Supplementary file 1 [file 1532dc03db61112980175761.docx]

# Supplementary Appendix

Table S1. Advisory information access item list and PCA loadings.

| **Code** | **Item** | **PC1 loading** |
| --- | --- | --- |
| o1 | Government-provided cropland conservation information | 0.749 |
| o2 | Amount of cropland conservation information obtained | 0.790 |
| o3 | Difficulty of obtaining cropland conservation information | -0.856 |
| o4 | Convenience of collecting relevant information | 0.898 |
| o5 | Ability to obtain sufficient information | 0.843 |
| o6 | Ability to use obtained information for cropland conservation | 0.831 |
| o7 | Timeliness of information collection | 0.878 |
| o8 | Speed of information collection | 0.889 |

Note: PC1 explains 70.5% of the variance; KMO=0.897; Bartlett test p<0.001. The variable is interpreted as advisory information access with digital elements, not exclusive exposure to a single digital platform. The negative loading for o3 is expected because the item is opposite-oriented: higher original values indicate greater information-acquisition difficulty. The final PC1 score is oriented so that higher values indicate stronger advisory information access.

Table S2. Questionnaire modules and analytical use.

| **Questionnaire module** | **Observed content** | **Use in manuscript** | **Interpretation boundary** |
| --- | --- | --- | --- |
| Personal and household characteristics | Gender, age, education, health, hukou, party/village-cadre status, short-video exposure | Background controls where available | Not used to claim province-wide representativeness |
| Conservation adoption practices | 11 binary adoption and willingness items: fertilisation, manure, straw returning, no-tillage, green manure, deep ploughing, soil amendment, fallow/rotation, film and pesticide-package recycling | Adopt_All and supplementary practice groups | Practice groups are analytical, not questionnaire-defined |
| Psychological constructs | Perceived barriers, PBC items on ease/control/resources/time/skills, and six intention items | Barrier_z, PBC_z, Intention_z | PBC is a subjective approximation of perceived executability |
| Information acquisition | Information quantity, difficulty, convenience, usefulness, timeliness, and collection speed | AdvisoryInformationAccess_PCA1 | Measures perceived advisory information access with digital elements |
| Digital agricultural services | E-commerce, 12316 service platform, agricultural information station, information-to-village project, internet access, traceability and certification-related tools | DigitalAdoption_Index | Captures digital service use/capability, not only advisory exposure |
| Policy support | Subsidy, investment, publicity, extension, training, regulation, and information provision | PolicyIntensity_Index | Policy exposure/control |
| Machinery and land operation | Self-owned machinery quantity, machinery investment, land area, number of plots, land transfer and recent farm-operation information | MachConstraint_z, ln_Fragmentation, controls | MachConstraint_z is a machinery-endowment proxy; service-market thickness is not directly observed |

Table S3. Missingness profile of core variables and estimation samples.

| **Variable / sample definition** | **Missing N** | **Missing %** | **Non-missing N** |
| --- | --- | --- | --- |
| MachConstraint_z | 73 | 20.3 | 287 |
| ln_Fragmentation | 58 | 16.1 | 302 |
| training_freq | 51 | 14.2 | 309 |
| farm_size | 34 | 9.4 | 326 |
| health_cat | 24 | 6.7 | 336 |
| Adopt_All | 0 | 0.0 | 360 |
| AdvisoryInformationAccess_PCA1 | 0 | 0.0 | 360 |
| PBC_z | 0 | 0.0 | 360 |
| Intention_z | 0 | 0.0 | 360 |
| PolicyIntensity_Index | 0 | 0.0 | 360 |
| Core mechanism model | 107 | 29.7 | 253 |
| Controlled behavioural model | 144 | 40.0 | 216 |

Note: The controlled behavioural model uses a smaller complete-case sample because machinery, land, training, and farm-operation controls contain item nonresponse. Missing-adjusted specifications are reported as robustness checks.

Table S4. Complete-case versus excluded-sample comparison.

| **Variable** | **Complete-case N** | **Complete-case mean** | **Excluded N** | **Excluded mean** | **Difference** | **Welch p-value** |
| --- | --- | --- | --- | --- | --- | --- |
| Adopt_All | 220 | 9.068 | 140 | 8.143 | 0.925 | 0.002 |
| AdvisoryInformationAccess_PCA1 | 220 | 0.054 | 140 | -0.084 | 0.138 | 0.210 |
| Intention_z | 220 | 0.050 | 140 | -0.079 | 0.129 | 0.254 |
| PBC_z | 220 | 0.032 | 140 | -0.050 | 0.082 | 0.447 |
| PolicyIntensity_Index | 220 | 6.418 | 140 | 6.393 | 0.025 | 0.873 |

Note: This diagnostic table uses the same 0-7 PolicyIntensity_Index reported in Table 1. The complete-case comparison is based on a narrower diagnostic control set than the main controlled behavioural models, which explains the difference between N=220 here and N=216 in the main tables.

Table S5. Sub-index heterogeneity of endowment-based execution interactions.

| **Outcome** | **Practice group** | **Intention x MachConstraint** | **PBC x MachConstraint** | **N** | **Interpretation** |
| --- | --- | --- | --- | --- | --- |
| Adopt_All | All practices | -0.193*** (0.037) | 0.260*** (0.027) | 252 | Main aggregate pattern. |
| Adopt_Operation | Machinery-intensive | -0.108 (0.076) | 0.116* (0.060) | 252 | Mechanically intensive group; PBC interaction is positive but weaker than aggregate. |
| Adopt_Input | Input-management | -0.263*** (0.080) | 0.322*** (0.057) | 252 | Suggests machinery endowment may proxy broader execution capacity. |
| Adopt_Recycle | Recycling | -0.315** (0.143) | 0.434*** (0.095) | 252 | Recycling may depend on local service/coordination conditions. |

Note: Binomial models are used for bounded sub-index outcomes. These estimates are practice-heterogeneity diagnostics, not a separate causal test. The stronger interaction in input and recycling outcomes indicates that MachConstraint_z should be read as a broader execution-capacity proxy rather than as machinery ownership alone.

Table S6. Full behavioural models with controls.

| **Variable** | **OLS** | **Poisson** | **Binomial 11** |
| --- | --- | --- | --- |
| AdvisoryInformationAccess_PCA1 | -0.219 (0.301) | -0.024 (0.030) | -0.137 (0.178) |
| DigitalAdoption_Index | 0.091 (0.105) | 0.010 (0.011) | 0.061 (0.059) |
| Barrier_z | -0.005 (0.168) | -0.000 (0.017) | -0.007 (0.092) |
| PBC_z | 0.434** (0.221) | 0.048** (0.022) | 0.274** (0.128) |
| Intention_z | -0.209 (0.201) | -0.024 (0.020) | -0.125 (0.114) |
| MachConstraint_z | -0.020 (0.196) | -0.002 (0.019) | -0.021 (0.105) |
| ln_Fragmentation | -0.070 (0.102) | -0.008 (0.010) | -0.050 (0.057) |
| PolicyIntensity_Index | 0.280* (0.169) | 0.034* (0.018) | 0.146* (0.079) |
| Gender | 0.012 (0.663) | -0.000 (0.065) | 0.032 (0.396) |
| Age category | -0.294 (0.210) | -0.032 (0.021) | -0.204 (0.129) |
| Education category | -0.001 (0.330) | 0.001 (0.032) | -0.018 (0.191) |
| Health category | 0.014 (0.513) | 0.003 (0.050) | -0.017 (0.285) |
| Party member | -0.998** (0.495) | -0.112** (0.050) | -0.621** (0.263) |
| Village-cadre status | -0.092 (0.486) | -0.010 (0.049) | -0.059 (0.248) |
| Short-video exposure | 0.748* (0.438) | 0.083* (0.045) | 0.491** (0.242) |
| Farm size control (scale variable) | <0.001 (<0.001) | <0.001 (<0.001) | <0.001 (<0.001) |
| Training frequency | -0.021 (0.089) | -0.002 (0.006) | -0.016 (0.028) |
| N | 216 | 216 | 216 |

Note: Robust standard errors in parentheses. The coefficients for demographic and farm-operation controls are reported here to document the parsimonious control structure used in the main behavioural models.

Note on farm-size control: Farm size is retained only as a scale control. Because the original survey recorded land area in local Chinese area units and the coefficient is not substantively interpreted, it is reported as a scale control in the appendix.

Table S7. Missing-adjusted robustness model.

| **Variable** | **OLS missing-adjusted coefficient** | **SE** | **p** | **N** |
| --- | --- | --- | --- | --- |
| AdvisoryInformationAccess_PCA1 | 0.126 | 0.206 | 0.541 | 360 |
| DigitalAdoption_Index | 0.140 | 0.077 | 0.069 | 360 |
| Barrier_z | 0.198 | 0.138 | 0.151 | 360 |
| PBC_z | 0.174 | 0.166 | 0.294 | 360 |
| Intention_z | 0.084 | 0.159 | 0.599 | 360 |
| MachConstraint_z | 0.182 | 0.167 | 0.274 | 360 |
| ln_Fragmentation | -0.060 | 0.081 | 0.460 | 360 |
| PolicyIntensity_Index | 0.334 | 0.138 | 0.015 | 360 |
| MachConstraint_z_missing | -0.548 | 0.409 | 0.180 | 360 |
| ln_Fragmentation_missing | -1.985 | 0.502 | 0.000 | 360 |
| farm_size_missing | 1.206 | 0.620 | 0.052 | 360 |
| training_freq_missing | 0.344 | 0.590 | 0.559 | 360 |

Note: Median imputation with missingness flags retains all 360 observations. GLM versions with all missingness flags were not stable because of singularity; therefore this table is used as a diagnostic robustness check rather than as the main behavioural specification.

Table S8. Threshold sensitivity checks for endowment-constraint groups.

| **Quantile** | **Group** | **N** | **Term** | **Coef** | **SE** | **p** |
| --- | --- | --- | --- | --- | --- | --- |
| 0.4 | LowConstraint | 110 | Intention | 0.483 | 0.224 | 0.031 |
| 0.4 | LowConstraint | 110 | PBC | 0.339 | 0.351 | 0.335 |
| 0.4 | LowConstraint | 110 | AdvisoryInformationAccess_PCA1 | -0.063 | 0.470 | 0.893 |
| 0.4 | HighConstraint | 129 | Intention | -0.699 | 0.370 | 0.059 |
| 0.4 | HighConstraint | 129 | PBC | 0.760 | 0.327 | 0.020 |
| 0.4 | HighConstraint | 129 | AdvisoryInformationAccess_PCA1 | -0.357 | 0.402 | 0.374 |
| 0.5 | LowConstraint | 127 | Intention | 0.232 | 0.219 | 0.290 |
| 0.5 | LowConstraint | 127 | PBC | 0.404 | 0.303 | 0.182 |
| 0.5 | LowConstraint | 127 | AdvisoryInformationAccess_PCA1 | -0.196 | 0.415 | 0.637 |
| 0.5 | HighConstraint | 112 | Intention | -0.597 | 0.467 | 0.201 |
| 0.5 | HighConstraint | 112 | PBC | 0.663 | 0.359 | 0.065 |
| 0.5 | HighConstraint | 112 | AdvisoryInformationAccess_PCA1 | -0.260 | 0.469 | 0.580 |
| 0.6 | LowConstraint | 143 | Intention | 0.130 | 0.234 | 0.579 |
| 0.6 | LowConstraint | 143 | PBC | 0.291 | 0.288 | 0.313 |
| 0.6 | LowConstraint | 143 | AdvisoryInformationAccess_PCA1 | -0.443 | 0.389 | 0.254 |
| 0.6 | HighConstraint | 96 | Intention | -0.548 | 0.481 | 0.255 |
| 0.6 | HighConstraint | 96 | PBC | 0.687 | 0.378 | 0.069 |
| 0.6 | HighConstraint | 96 | AdvisoryInformationAccess_PCA1 | -0.169 | 0.490 | 0.731 |

Note: Alternative thresholds show that the high-constraint PBC slope remains positive, while the intention slope is generally weaker or negative in high-constraint groups. These subgroup patterns are diagnostic rather than causal.

Table S9. Practice-specific logit models for intention attenuation.

| **Practice** | **Mean adoption** | **Intention x MachConstraint** | **SE** | **p** | **N** |
| --- | --- | --- | --- | --- | --- |
| b2 Soil-testing formula fertilisation | 0.932 | -0.273 | 0.460 | 0.553 | 236 |
| b4 Farmyard manure application | 0.725 | -0.016 | 0.200 | 0.934 | 236 |
| b6 Straw returning | 0.881 | 0.092 | 0.299 | 0.759 | 236 |
| b8 No-tillage seeding | 0.805 | -0.026 | 0.209 | 0.900 | 236 |
| b10 Green manure planting | 0.936 | -0.283 | 0.338 | 0.402 | 236 |
| b12 Deep ploughing/subsoiling | 0.835 | -0.299 | 0.222 | 0.179 | 236 |
| b14 Commercial organic fertiliser | 0.797 | -0.394 | 0.224 | 0.079 | 236 |
| b16 Lime/gypsum amendment | 0.754 | -0.072 | 0.203 | 0.723 | 236 |
| b18 Rotation/fallow practice | 0.720 | -0.174 | 0.166 | 0.296 | 236 |
| b20 Agricultural film recovery | 0.648 | -0.307 | 0.174 | 0.078 | 236 |
| b22 Pesticide-package recycling | 0.797 | -0.226 | 0.208 | 0.278 | 236 |

Note: Practice-specific logit models are used to examine heterogeneity. The evidence is mixed and should not be interpreted as proof that every practice follows the same mechanism.
